# Supplementary material
Source: Copernicus journal article supplement (doi:10.5194/wcd-7-681-2026)
Supplement: Supplementary file 1 [file wcd-7-681-2026-supplement.pdf]

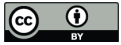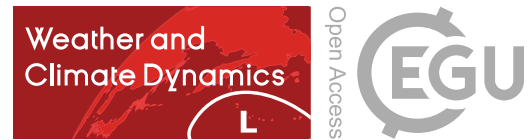

*Supplement of*

## **Persistent SST anomaly vs. dynamical ocean model in winter weather forecasts: Global Ensemble Prediction System versions 5 and 6 over the North Pacific and North Atlantic**

**Tien-Yiao Hsu et al.**

*Correspondence to:* Tien-Yiao Hsu (tienyiao@ucsd.edu)

The copyright of individual parts of the supplement might differ from the article licence.

This document contains hyperlinks to GEPS5 and GEPS6 technical reports, 1 section of text, 2 tables and 2 figures.

## S1. HYPERLINKS TO TECHNICAL REPORT

- GEPS6 technical report (Lin et al. 2019): [https://collaboration.cmc.ec.gc.ca/cmc/cmoi/product\\_guide/docs/tech\\_notes/technote\\_geps-600\\_e.pdf](https://collaboration.cmc.ec.gc.ca/cmc/cmoi/product_guide/docs/tech_notes/technote_geps-600_e.pdf)

## S2. TEXT

### A. Handling 1-day Difference in start times

Since the start times in GEPS5 and GESP6 are off by 1-day, we use ERA5 as a reference dataset to compute bias. Since this approach is not traditionally used, here we provide our reasoning.

The ideal bias change computation is

$$\Delta\beta_X^*(t_s, t_l) = X_{\text{GEP6}}(t_s, t_l) - X_{\text{GEP5}}(t_s, t_l), \quad (\text{S1})$$

where  $\Delta\beta_X^*$  is the difference of variable  $X$  between GEPS5 and GEPS6 of start time  $t_s$  and lead time  $t_l$  in the ideal form, denoted by asterisk. However, due to operational reasons, start times of GEPS6 are always  $\tau = 1$  day earlier than those of GESP5. Our bias workaround is

$$\Delta\beta_X(t_s, t_l) = [X_{\text{GEP6}}(t_s - \tau, t_l) - X_{\text{ERA5}}(t_s - \tau + t_l)] - [X_{\text{GEP5}}(t_s, t_l) - X_{\text{ERA5}}(t_s + t_l)]. \quad (\text{S2})$$

Defining  $\omega_{\tau, X}$  as the difference between (S1) and (S2), we derive

$$\begin{aligned} \omega_{\tau, X} &:= \Delta\beta_X(t_s, t_l) - \Delta\beta_X^*(t_s, t_l) \\ &= [X_{\text{ERA5}}(t_s + t_l) - X_{\text{ERA5}}(t_s + t_l - \tau)] - [X_{\text{GEP6}}(t_s, t_l) - X_{\text{GEP6}}(t_s - \tau, t_l)], \end{aligned} \quad (\text{S3})$$

where  $\omega_{\tau, X}$  would vanish if GESP6 matches perfectly to ERA5.

To mitigate the impact of  $\omega_{\tau, X}$ , we apply a pentad window  $\Delta w$  on lead time  $t_l$  and average across the start times of the same start time group  $\phi$

$$\Omega_{\tau, X}(\phi, p) = \frac{1}{|\phi|} \left[ \frac{1}{\Delta w} \sum_{t_s \in \phi} \int_{t_l=(p-1)\Delta w}^{p\Delta w} \omega_{\tau, X}(t_s, t_l) dt_l \right] \quad (\text{S4})$$

where  $|\phi|$  is the size of the start time set, and  $p$  is a positive integer that numbers the lead pentad starting from 1. Because the synoptic scale dominates the medium-range weather, we choose  $\Delta w = 5$  day. Moreover, assuming the distribution of  $\omega_{\tau, X}(t_s, t_l)$  is a Gaussian with zero mean over start time  $t_s \in \phi$ . With these two reasons,  $\Omega_{\tau, X}(\phi, p)$  should be sufficiently small. Therefore, with the usage of reference data ERA5 and averaging, (S2) can approximate (S1), i.e.,

$$\frac{1}{|\phi|} \left[ \frac{1}{\Delta w} \sum_{t_s \in \phi} \int_{t_l=(p-1)\Delta w}^{p\Delta w} \Delta\beta_X^*(t_s, t_l) dt_l \right] \approx \frac{1}{|\phi|} \left[ \frac{1}{\Delta w} \sum_{t_s \in \phi} \int_{t_l=(p-1)\Delta w}^{p\Delta w} \Delta\beta_X(t_s, t_l) dt_l \right] = \Delta B_X(\phi, p) \quad (\text{S5})$$

where the mean bias change  $\Delta B_X(\phi, p)$  is (4) in the main text. Although we cannot compute the expression (S4) because we have  $X_{\text{GEP6}}(t_s, t_l)$  but not  $X_{\text{GEP6}}(t_s + \tau, t_l)$ , (S4) helps readers understand our approach. In principle, the smallness of (S4) depends on the quality of GEPS6 simulation, whose verification against ERA-Interim can be found in technical report provided above in Section 1.

## S3. TABLES

**Table S1.** GEPS5 data count. Note that there are 20 years and 4 ensemble members.

| Month | Count per year per member | Valid dates       |
|-------|---------------------------|-------------------|
| Jan   | 5                         | 3, 10, 17, 24, 31 |
| Feb   | 4                         | 7, 14, 21, 28     |
| Mar   | 4                         | 7, 14, 21, 28     |
| Apr   | 4                         | 4, 11, 18, 25     |
| May   | 5                         | 2, 9, 16, 23, 30  |
| Jun   | 4                         | 6, 13, 20, 27     |
| Jul   | 0                         | N/A               |
| Aug   | 0                         | N/A               |
| Sep   | 1                         | 27                |
| Oct   | 4                         | 4, 11, 18, 25     |
| Nov   | 5                         | 1, 8, 15, 22, 29  |
| Dec   | 4                         | 6, 13, 20, 27     |

#### **S4. PLOTS**

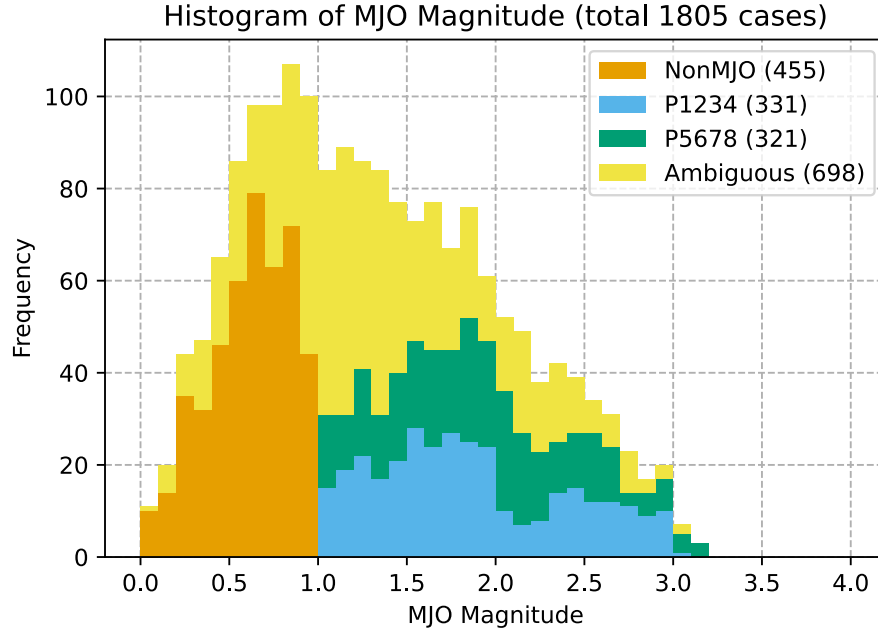

**Fig. S1.** Histogram of start times classified with MJO groups: NonMJO, P1234, P5678, and Ambiguous.

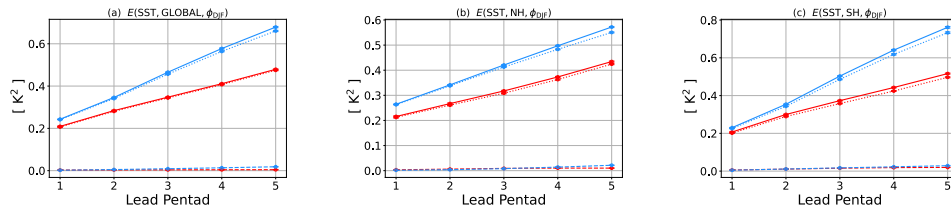

**Fig. S2.** Bias variance  $E$  analysis of global sea surface temperature (SST) as a function of pentads 1–6 computed from Global Ensemble Prediction System (GEPS) version 5 (GEPS5, red) to GEPS version 6 (GEPS6, blue) during December–January–February of lead pentads 1 to 5 in hindcast years 1998–2017. The regions presented are (a) global, (b) Northern hemisphere, and (c) Southern hemisphere oceans. The decomposition of  $E$  into mean ( $\bar{E}$ , dashed) and patterned ( $\tilde{E}$ , dotted) variances are added. The whiskers represent the standard error.

**Table S2.** GEPS6 data count and their start times. The count of subsampled GEPS6 is documented in parentheses, and the start times are underlined. Note that there are 20 years and 4 ensemble members.

| Month | Count per year per member | Valid dates                                                                            |
|-------|---------------------------|----------------------------------------------------------------------------------------|
| Jan   | 9 (5)                     | <u>2</u> , 7, <u>9</u> , 14, <u>16</u> , 21, <u>23</u> , 28, <u>30</u>                 |
| Feb   | 8 (4)                     | 4, <u>6</u> , 11, <u>13</u> , 18, <u>20</u> , 25, <u>27</u>                            |
| Mar   | 8 (4)                     | 4, <u>5</u> , 11, <u>12</u> , 18, <u>19</u> , 25, <u>26</u>                            |
| Apr   | 10 (5)                    | 1, <u>2</u> , 8, <u>9</u> , 15, <u>16</u> , 22, <u>23</u> , 29, <u>30</u>              |
| May   | 8 (4)                     | 6, <u>7</u> , 13, <u>14</u> , 20, <u>21</u> , 27, <u>28</u>                            |
| Jun   | 8 (4)                     | 3, <u>4</u> , 10, <u>11</u> , 17, <u>18</u> , 24, <u>25</u>                            |
| Jul   | 11 (0)                    | 1, 2, 8, 9, 15, 16, 22, 23, 25, 29, 30                                                 |
| Aug   | 13 (0)                    | 1, 5, 6, 8, 12, 13, 15, 19, 20, 22, 26, 27, 29                                         |
| Sep   | 13 (1)                    | 2, 3, 5, 9, 10, 12, 16, 17, 19, 23, 24, <u>26</u> , 30                                 |
| Oct   | 13 (5)                    | 1, <u>3</u> , 7, <u>10</u> , 14, 15, <u>17</u> , 21, 22, <u>24</u> , 28, 29, <u>31</u> |
| Nov   | 12 (4)                    | 4, 5, <u>7</u> , 11, 12, <u>14</u> , 18, 19, <u>21</u> , 25, 26, <u>28</u>             |
| Dec   | 9 (4)                     | 3, <u>5</u> , 10, <u>12</u> , 17, <u>19</u> , 24, <u>26</u> , 31                       |
